# Supplementary material for: Effect of LongZhang Gargle on Dual‐Species Biofilm of Candida albicans and Streptococcus mutans
Source: Hindawi journal article supplement (doi:10.1155/2021/6654793), 2021-01-01

## Supplementary Materials

Figure S1: The influence of LongZhang Gargle on pH in growth environment of biofilms. The error bars indicate the standard deviation (SD). There is no statistical significance from control.

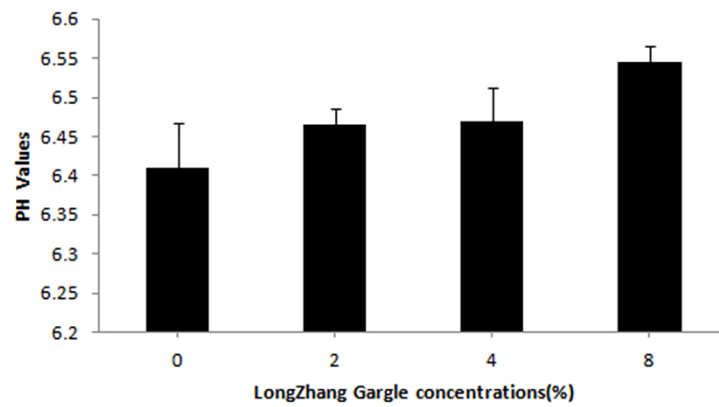

Supplement: f1 [file 6654793.f1.pdf]
